# Supplementary material for: (FexNi1−x)4N nanoparticles: magnetism and electrocatalytic properties for the oxygen evolution reaction
Source: Royal Society of Chemistry journal article supplement (doi:10.1039/d2nj01147f), 2022-01-01
Supplement: d2nj01147f1.pdf [file d2nj01147f1.pdf]

## Supporting information

# $(\text{Fe}_x\text{Ni}_{1-x})_4\text{N}$ Nanoparticles: Magnetism and Electrocatalytic Properties for Oxygen Evolution Reaction

### Structural characterization

X-ray diffraction (XRD) patterns were recorded to analyze the phase and crystal structure of the as-synthesized samples using a Shimadzu XRD-6100, operated at a step size of  $0.06^\circ$  in the range of  $30\text{--}708$  and with  $\text{Cu}_{K\alpha}$  radiation ( $\lambda=0.15405$  nm). The samples were examined to obtain size/shape images of nanostructured materials using a Philips Tecnai G2 F20 high-resolution transmission electron microscopy (HRTEM). X-ray photoelectron spectroscopy (XPS) was conducted on a Thermo VG Scientific ESCALAB 250 spectrometer with a monochromated  $\text{Al}_{K\alpha}$  excitation source. A vibrating sample magnetometer (VSM, Lake Shore 7404) was used to characterize the magnetic properties of as-synthesized samples. The magnetic hysteresis curve was obtained by changing magnetic field between  $+17000$  and  $-17000$  Oe.

### Electrochemical Measurements

All electrolysis measurements were conducted on a CHI650 Electrochemical work station in  $\text{O}_2$ -saturated 1 M KOH solution. Typically, a mixture of ultrapure water (715  $\mu\text{L}$ ), ethanol (245  $\mu\text{L}$ ), and Nafion solution (40  $\mu\text{L}$ ), catalysts (4 mg) and acetylene black (1 mg) was dispersed by sonication for 30 min. Then 10  $\mu\text{L}$  of homogeneous catalyst ink was dropped on to a polished glassy carbon electrode with a diameter of 3 mm ( $0.57$  mg  $\text{cm}^{-2}$ ) as the working electrode. Platinum wire was used as the counter electrode and an Hg/HgO electrode as the reference electrode. Linear scan voltammetry was performed at a scan rate of  $5$  mV  $\cdot$  s $^{-1}$  to obtain polarization curves. During the test, the system was continuously purged with high-purity  $\text{O}_2$ . All of the potentials were calibrated to the RHE by adding a value of  $0.924$  V ( $E_{\text{RHE}}=E_{\text{Hg/HgO}^+} (0.059 \times \text{pH}) + 0.098$ ). The OER equilibrium potential ( $E_0$ ) is  $1.23$  V vs RHE. The overpotential is the potential difference between  $E_{\text{RHE}}$  and  $E_0$ .

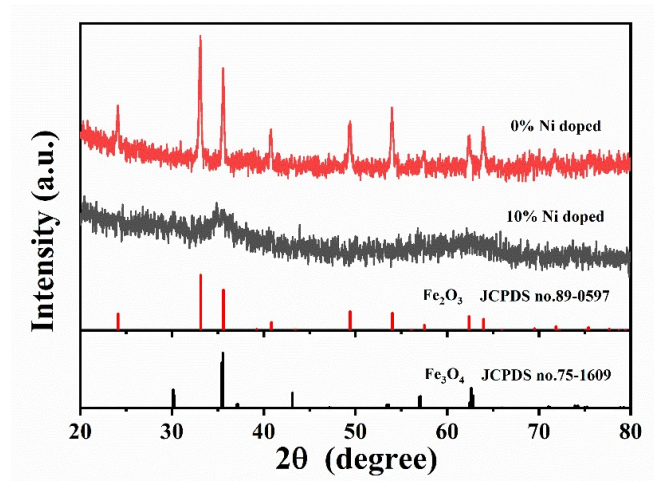

Fig. S1 The XRD spectra of 0% and 10% Ni-doped iron oxide precursor after solvothermal.

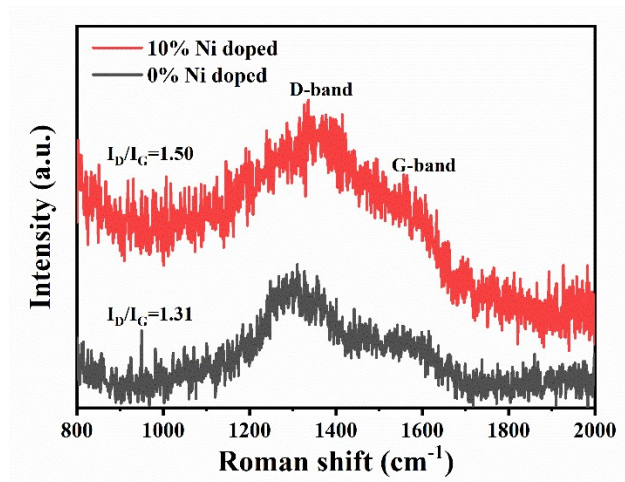

Fig. S2 Raman spectrum for  $(\text{Fe}_1\text{Ni}_0)_4\text{N}$  and  $(\text{Fe}_{0.90}\text{Ni}_{0.10})_4\text{N}$ .

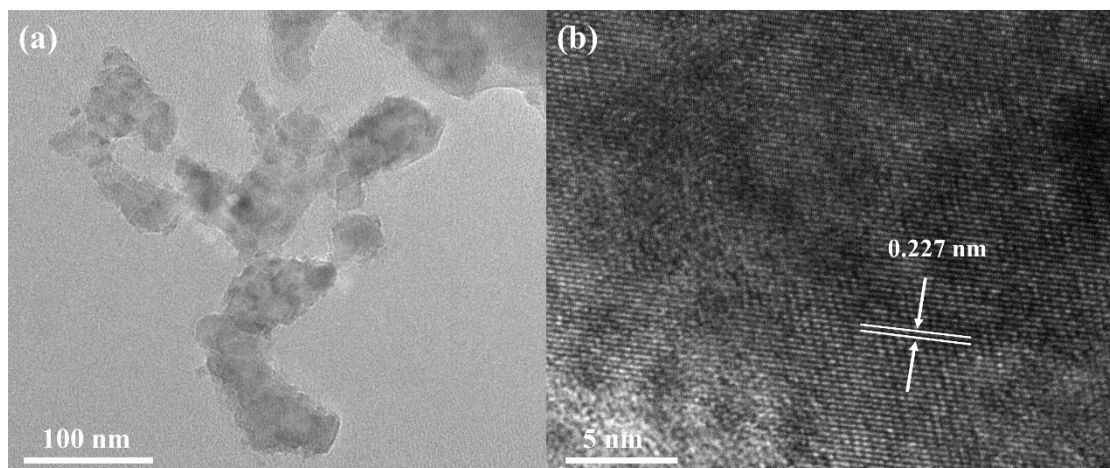

Fig. S3 (a) Low-magnification TEM images (b) High-magnification TEM images for  $(\text{Fe}_1\text{Ni}_0)_4\text{N}$  samples.

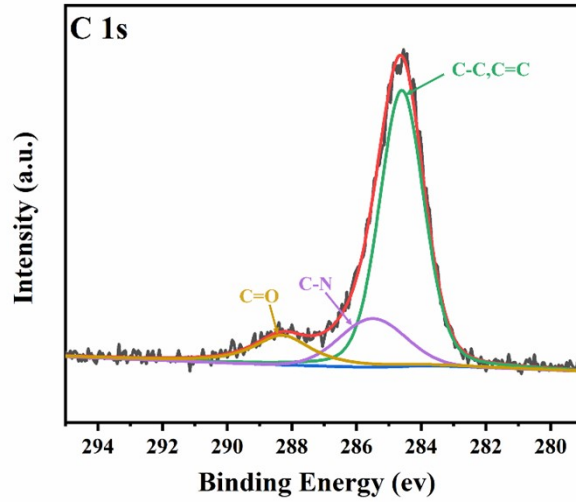

Fig. S4 High-resolution XPS spectra of C 1s for  $(\text{Fe}_{0.90}\text{Ni}_{0.10})_4\text{N}$ .

**Table S1.** The element contents for  $(\text{Fe}_1\text{Ni}_0)_4\text{N}$  and  $(\text{Fe}_{0.90}\text{Ni}_{0.10})_4\text{N}$  samples from XPS results.

| Samples/element content                        | N 1s  | O 1s   | C 1s   | Fe 2p | Ni 2p |
|------------------------------------------------|-------|--------|--------|-------|-------|
| $(\text{Fe}_1\text{Ni}_0)_4\text{N}$           | 3.32% | 26.03% | 67.67% | 2.98% | ----- |
| $(\text{Fe}_{0.90}\text{Ni}_{0.10})_4\text{N}$ | 3.72% | 29.5%  | 60.9%  | 5.34% | 0.54% |

**Table S2** Magnetic parameters of products with different Ni doping concentrations

| The doping concentration of Ni | $M_s$<br>(emu/g) | $H_c$<br>(G) | $M_r$<br>(emu/g) |
|--------------------------------|------------------|--------------|------------------|
| 0%                             | 142.89           | 129.07       | 11.01            |
| 3%                             | 168.15           | 98.49        | 10.65            |
| 5%                             | 165.34           | 106.75       | 11.43            |
| 7%                             | 157.06           | 113.95       | 11.60            |
| 10%                            | 153.02           | 115.16       | 10.97            |
| 12%                            | 113.53           | 151.89       | 11.49            |
| 15%                            | 45.55            | 285.15       | 9.42             |

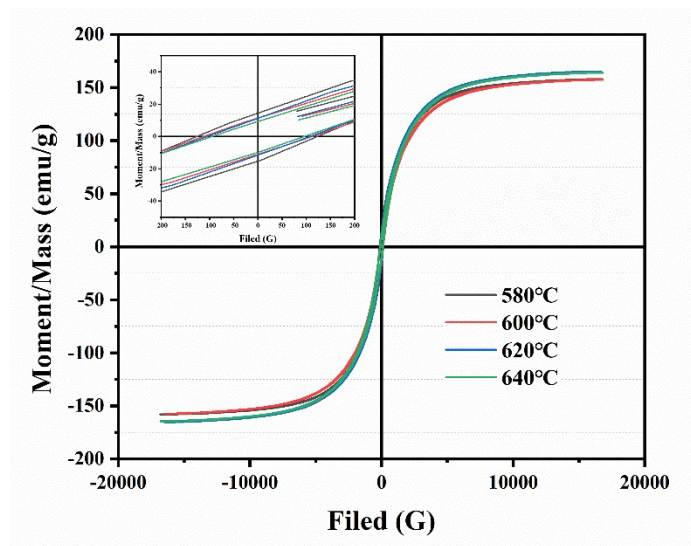

Fig. S5 Magnetic hysteresis loops at room temperature: samples with 5% Ni-doped prepared at different nitriding temperatures

**Table S3.** Comparison of the electrocatalytic performance of OER electrocatalysts reported recently,  $\eta_{10}$  is the overpotential at the current density of  $10 \text{ mA cm}^{-2}$ .

| Catalyst                                       | $\eta_{10}$ | Tafel slope | Electrolyte | Ref.      |
|------------------------------------------------|-------------|-------------|-------------|-----------|
| $(\text{Fe}_{0.90}\text{Ni}_{0.10})_4\text{N}$ | 292 mV      | 29          | 1 M KOH     | This work |
| $\text{Fe}_{\text{NP}}@\text{Fe-N-C}$          | 340 mV      | 216         | 0.1 M KOH   | [1]       |
| $\text{Fe}_2\text{P}/\text{Fe}_4\text{N}@C$    | 410 mV      | 177         | 1 M KOH     | [2]       |
| $\text{Ni}_2\text{Fe}_2\text{N}@N\text{-CS}$   | 264 mV      | 47.8        | 1 M KOH     | [3]       |
| $\text{Ni}_3\text{FeN}/N\text{-G}$             | 320 mV      | 45          | 1 M KOH     | [4]       |
| $\text{Ni}_3\text{FeN-NPs}$                    | 280 mv      | 46          | 1 M KOH     | [5]       |
| $\text{IrO}_2$                                 | 340 mV      | 61          | 1 M KOH     | [4]       |

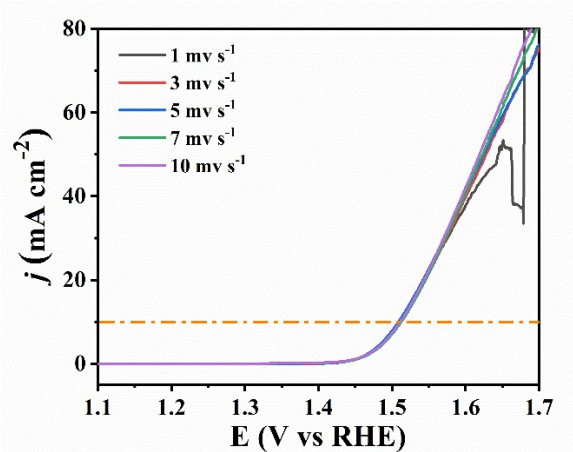

Fig. S6 Polarization curves recorded at different scan rate of the  $(\text{Fe}_{0.90}\text{Ni}_{0.10})_4\text{N}$  in 1.0 M KOH.

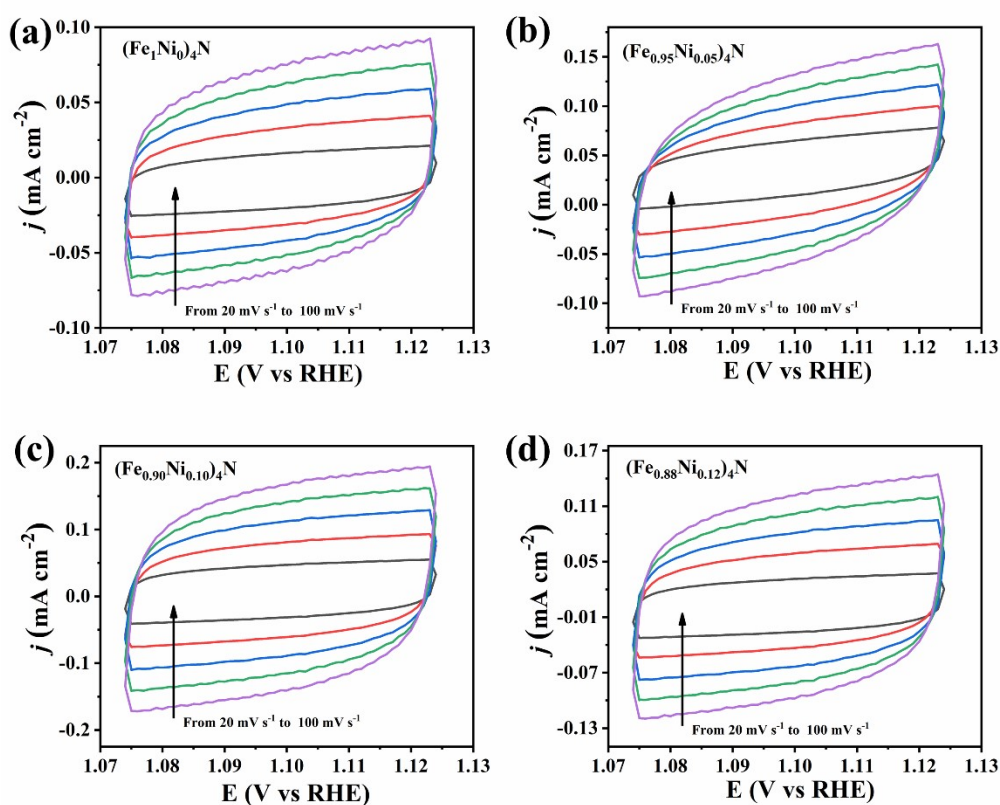

Fig. S7 CV curves of samples prepared with different nickel doping concentrations recorded at different scanning rates ranging from 20 to 100  $\text{mV s}^{-1}$  with an interval point of 20  $\text{mV s}^{-1}$ .

## References

- [1] C. Yang, S. Shang, Q. Gu, J. Shang, X.-y. Li, Metal-organic framework-derived carbon nanotubes with multi-active Fe-N/Fe sites as a bifunctional electrocatalyst for zinc-air battery. *J. Energy Chem.* 2022, 66, 306–31.

- [2] X. Fan, F. Kong, A. Kong, A. Chen, Z. Zhou, Y. Shan, Covalent Porphyrin Framework-Derived Fe<sub>2</sub>P@Fe<sub>4</sub>N-Coupled Nanoparticles Embedded in N-Doped Carbons as Efficient Trifunctional Electrocatalysts. *ACS Appl. Mater. Interfaces* 2017, 9, 32840–32850.
- [3] H. W. Choia, D. I. Jeong, S. B. Kwon, S. Woo, J. Kim, J. H. Kim, W. S. Yang, B. Lim, B. K. Kang, D. H. Yoon, Nickel-Iron nitrides and alloy heterojunction with amorphous N-doped carbon Shell: High-efficiency synergistic electrocatalysts for oxygen evolution reaction. *Appl. Surf. Sci.* 2021, 566, 150706.
- [4] S. Zhao, M. Li, M. Han, D. Xu, J. Yang, Y. Lin, N.-E. Shi, Y. Lu, R. Yang, B. Liu, Z. Dai, J. Bao, Defect-Rich Ni<sub>3</sub>FeN Nanocrystals Anchored on N-Doped Graphene for Enhanced Electrocatalytic Oxygen Evolution. *Adv. Funct. Mater.* 2018, 28, 1706018.
- [5] X. Jia, Y. Zhao, G. Chen, L. Shang, R. Shi, X. Kang, G. I. N. Waterhouse, L.-Z. Wu, C.-H. Tung, T. Zhang, Ni<sub>3</sub>FeN Nanoparticles Derived from Ultrathin NiFe-Layered Double Hydroxide Nanosheets: An Efficient Overall Water Splitting Electrocatalyst. *Adv. Energy Mater.* 2016, 6, 1502585.
